# Supplementary material
Source: publisher figshare collection journal article supplement (https://gsajournals.figshare.com/ndownloader/files/28005750)
Supplement: Supplementary file 1 [file 28005750]

**
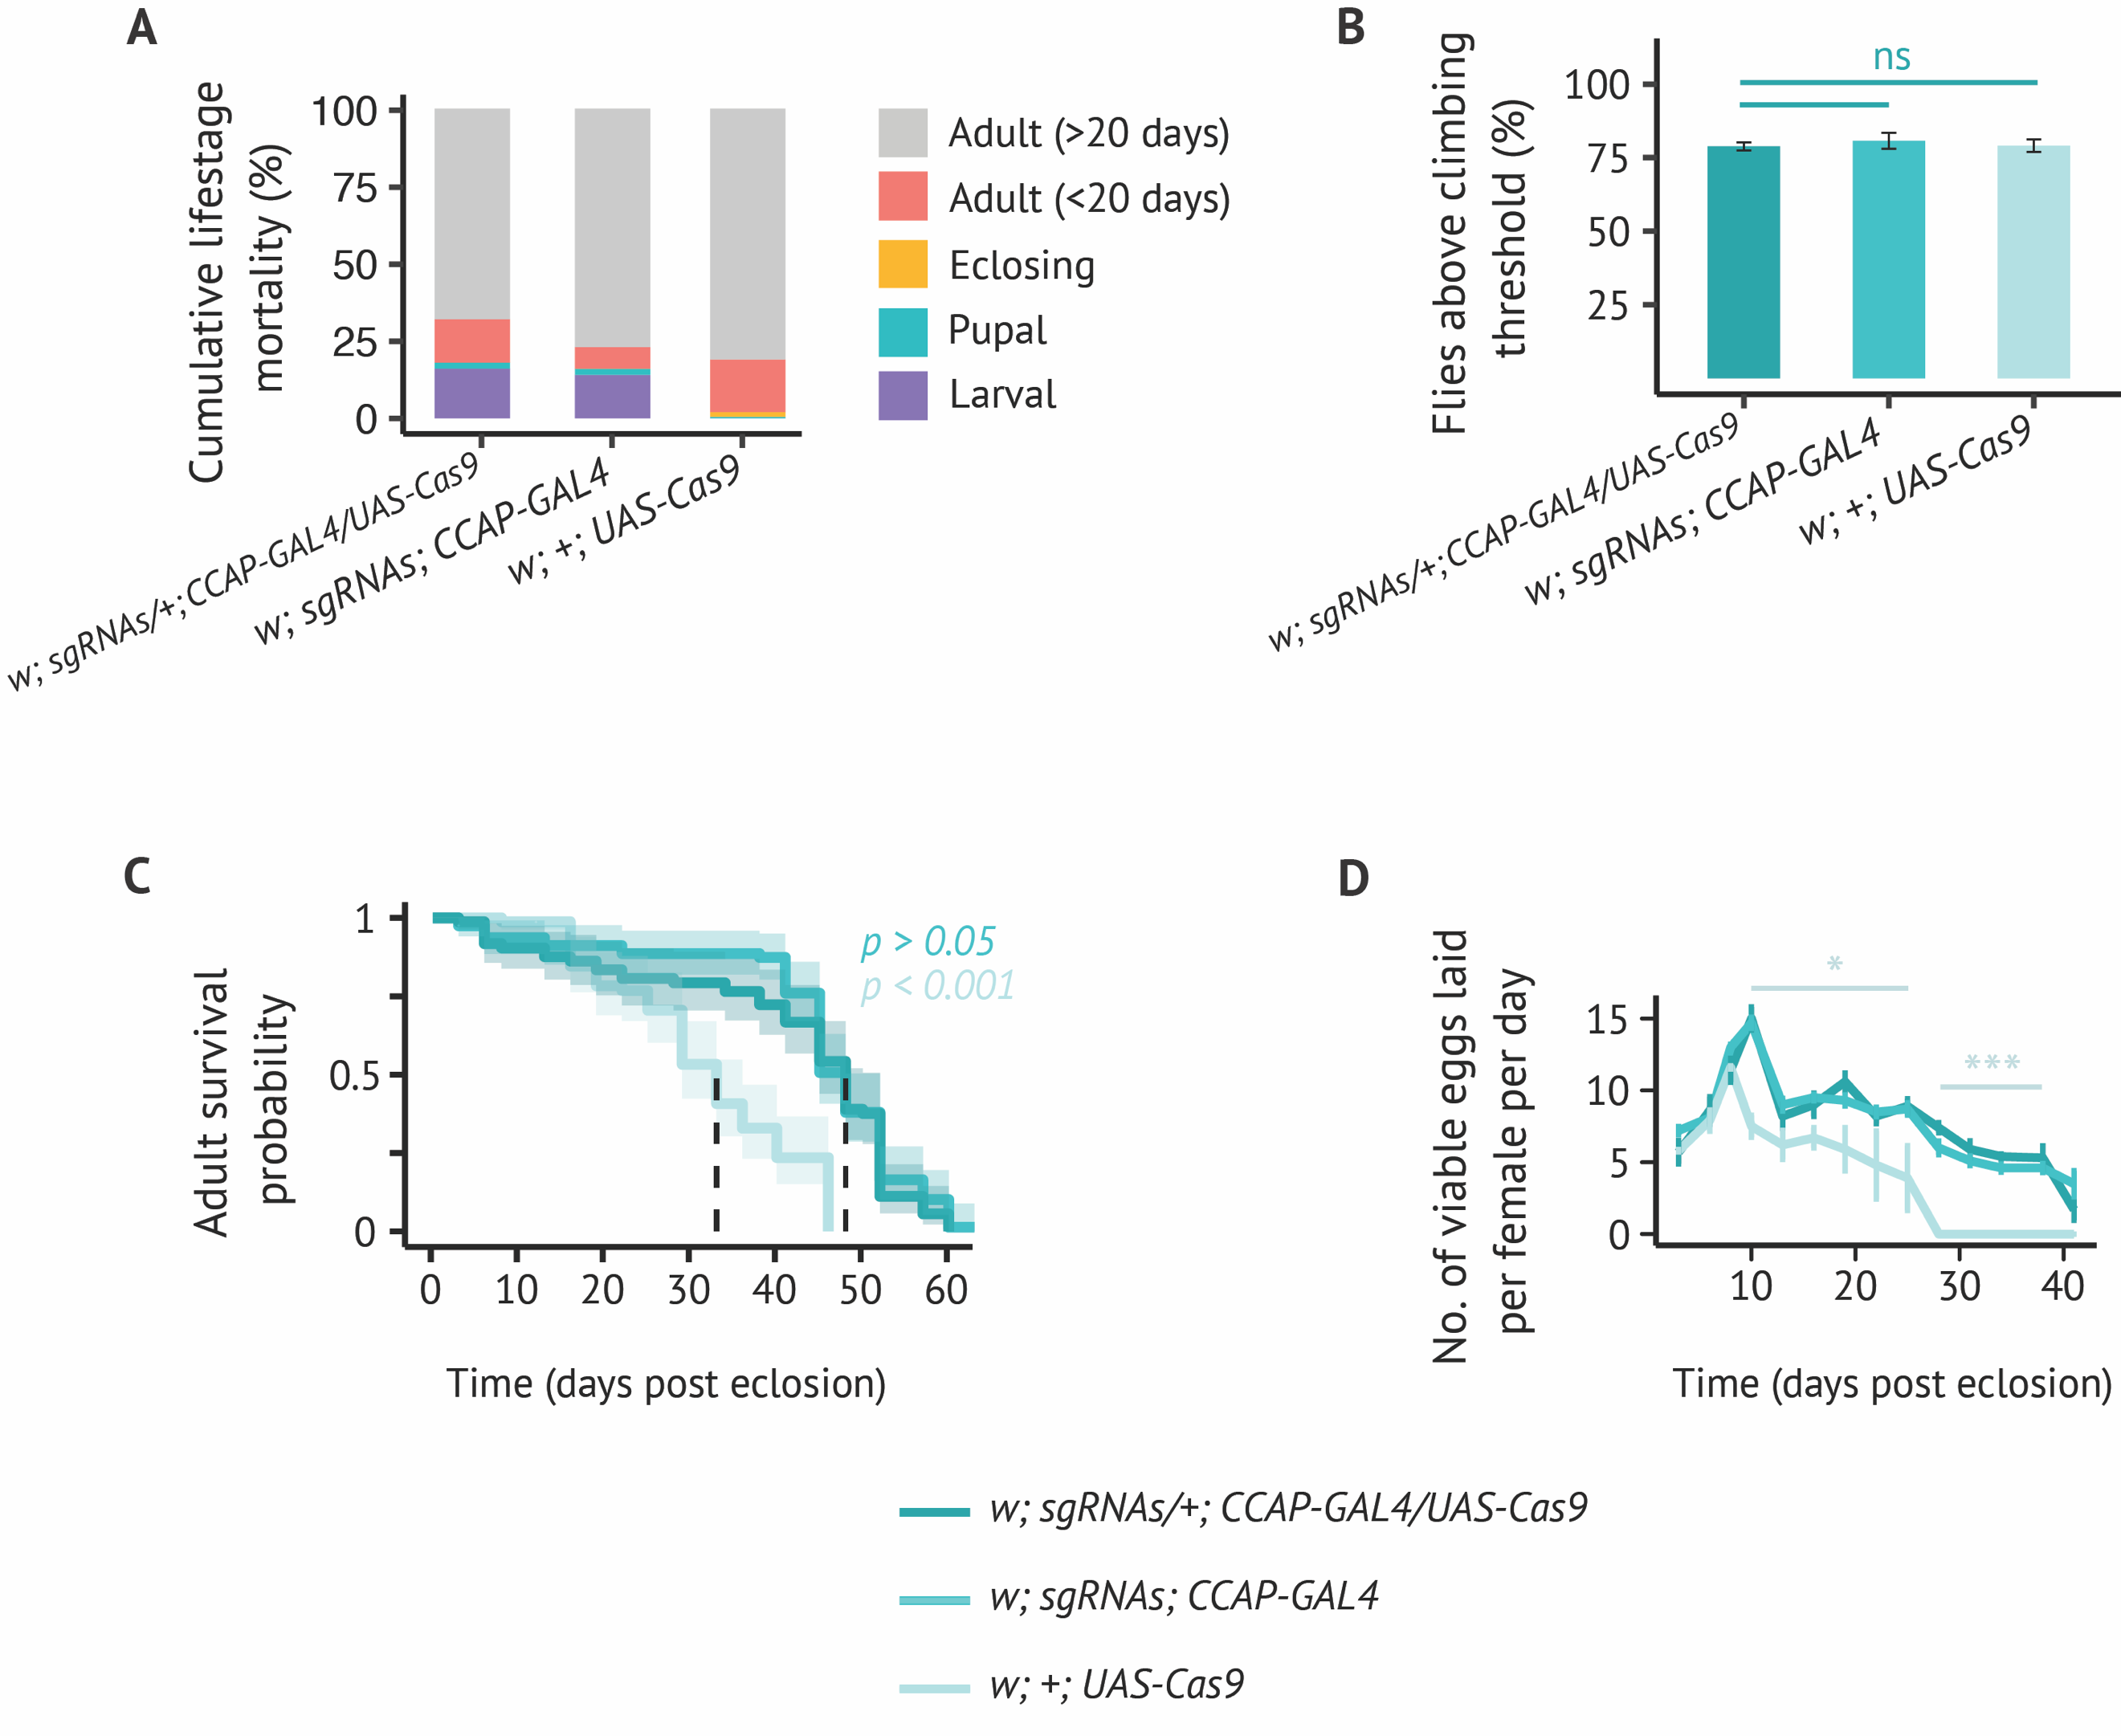
**

**Figure S7 *CCAP-*GAL4 CRISPR has no additional fitness effects**

Deletion of *Dβ1* specifically in CCAP neurons (*CCAP-*GAL4 CRISPR) has no detrimental effect relative to the parental controls in multiple fitness assays (except for wing expansion, Figure 5). (A) Proportion of deaths occurring at each developmental lifestage through to early and late adulthood (*n* = 250). (B) Percentage of individuals that successfully passed a 45mm threshold in climbing assays. Error bars indicate SEM (*n* = 80, *p >* 0.05, Tukey’s test). (C) Kaplan-Meier survival plot with black dashed lines marking median longevity. Longevity was significantly shorter in the UAS-Cas9 parental control, but no difference was observed between the other genotypes. Shading represents 95% confidence intervals (*n* = 80,Cox-Mantel test). (D) Number of viable eggs laid per female per day, throughout lifespan. Fertility was significantly lower for the UAS-Cas9 parental control, but no difference was observed between the other genotypes. Error bars indicate SEM (*n* = 40, * *p* < 0.05, *** *p* < 0.001, Student’s t-test performed for each time point).
